# Supplementary material for: Integrated multi-omics analysis and machine learning developed a prognostic model based on mitochondrial function in a large multicenter cohort for Gastric Cancer
Source: Springer Nature journal article supplement (doi:10.1186/s12967-024-05109-7), 2024-04-23

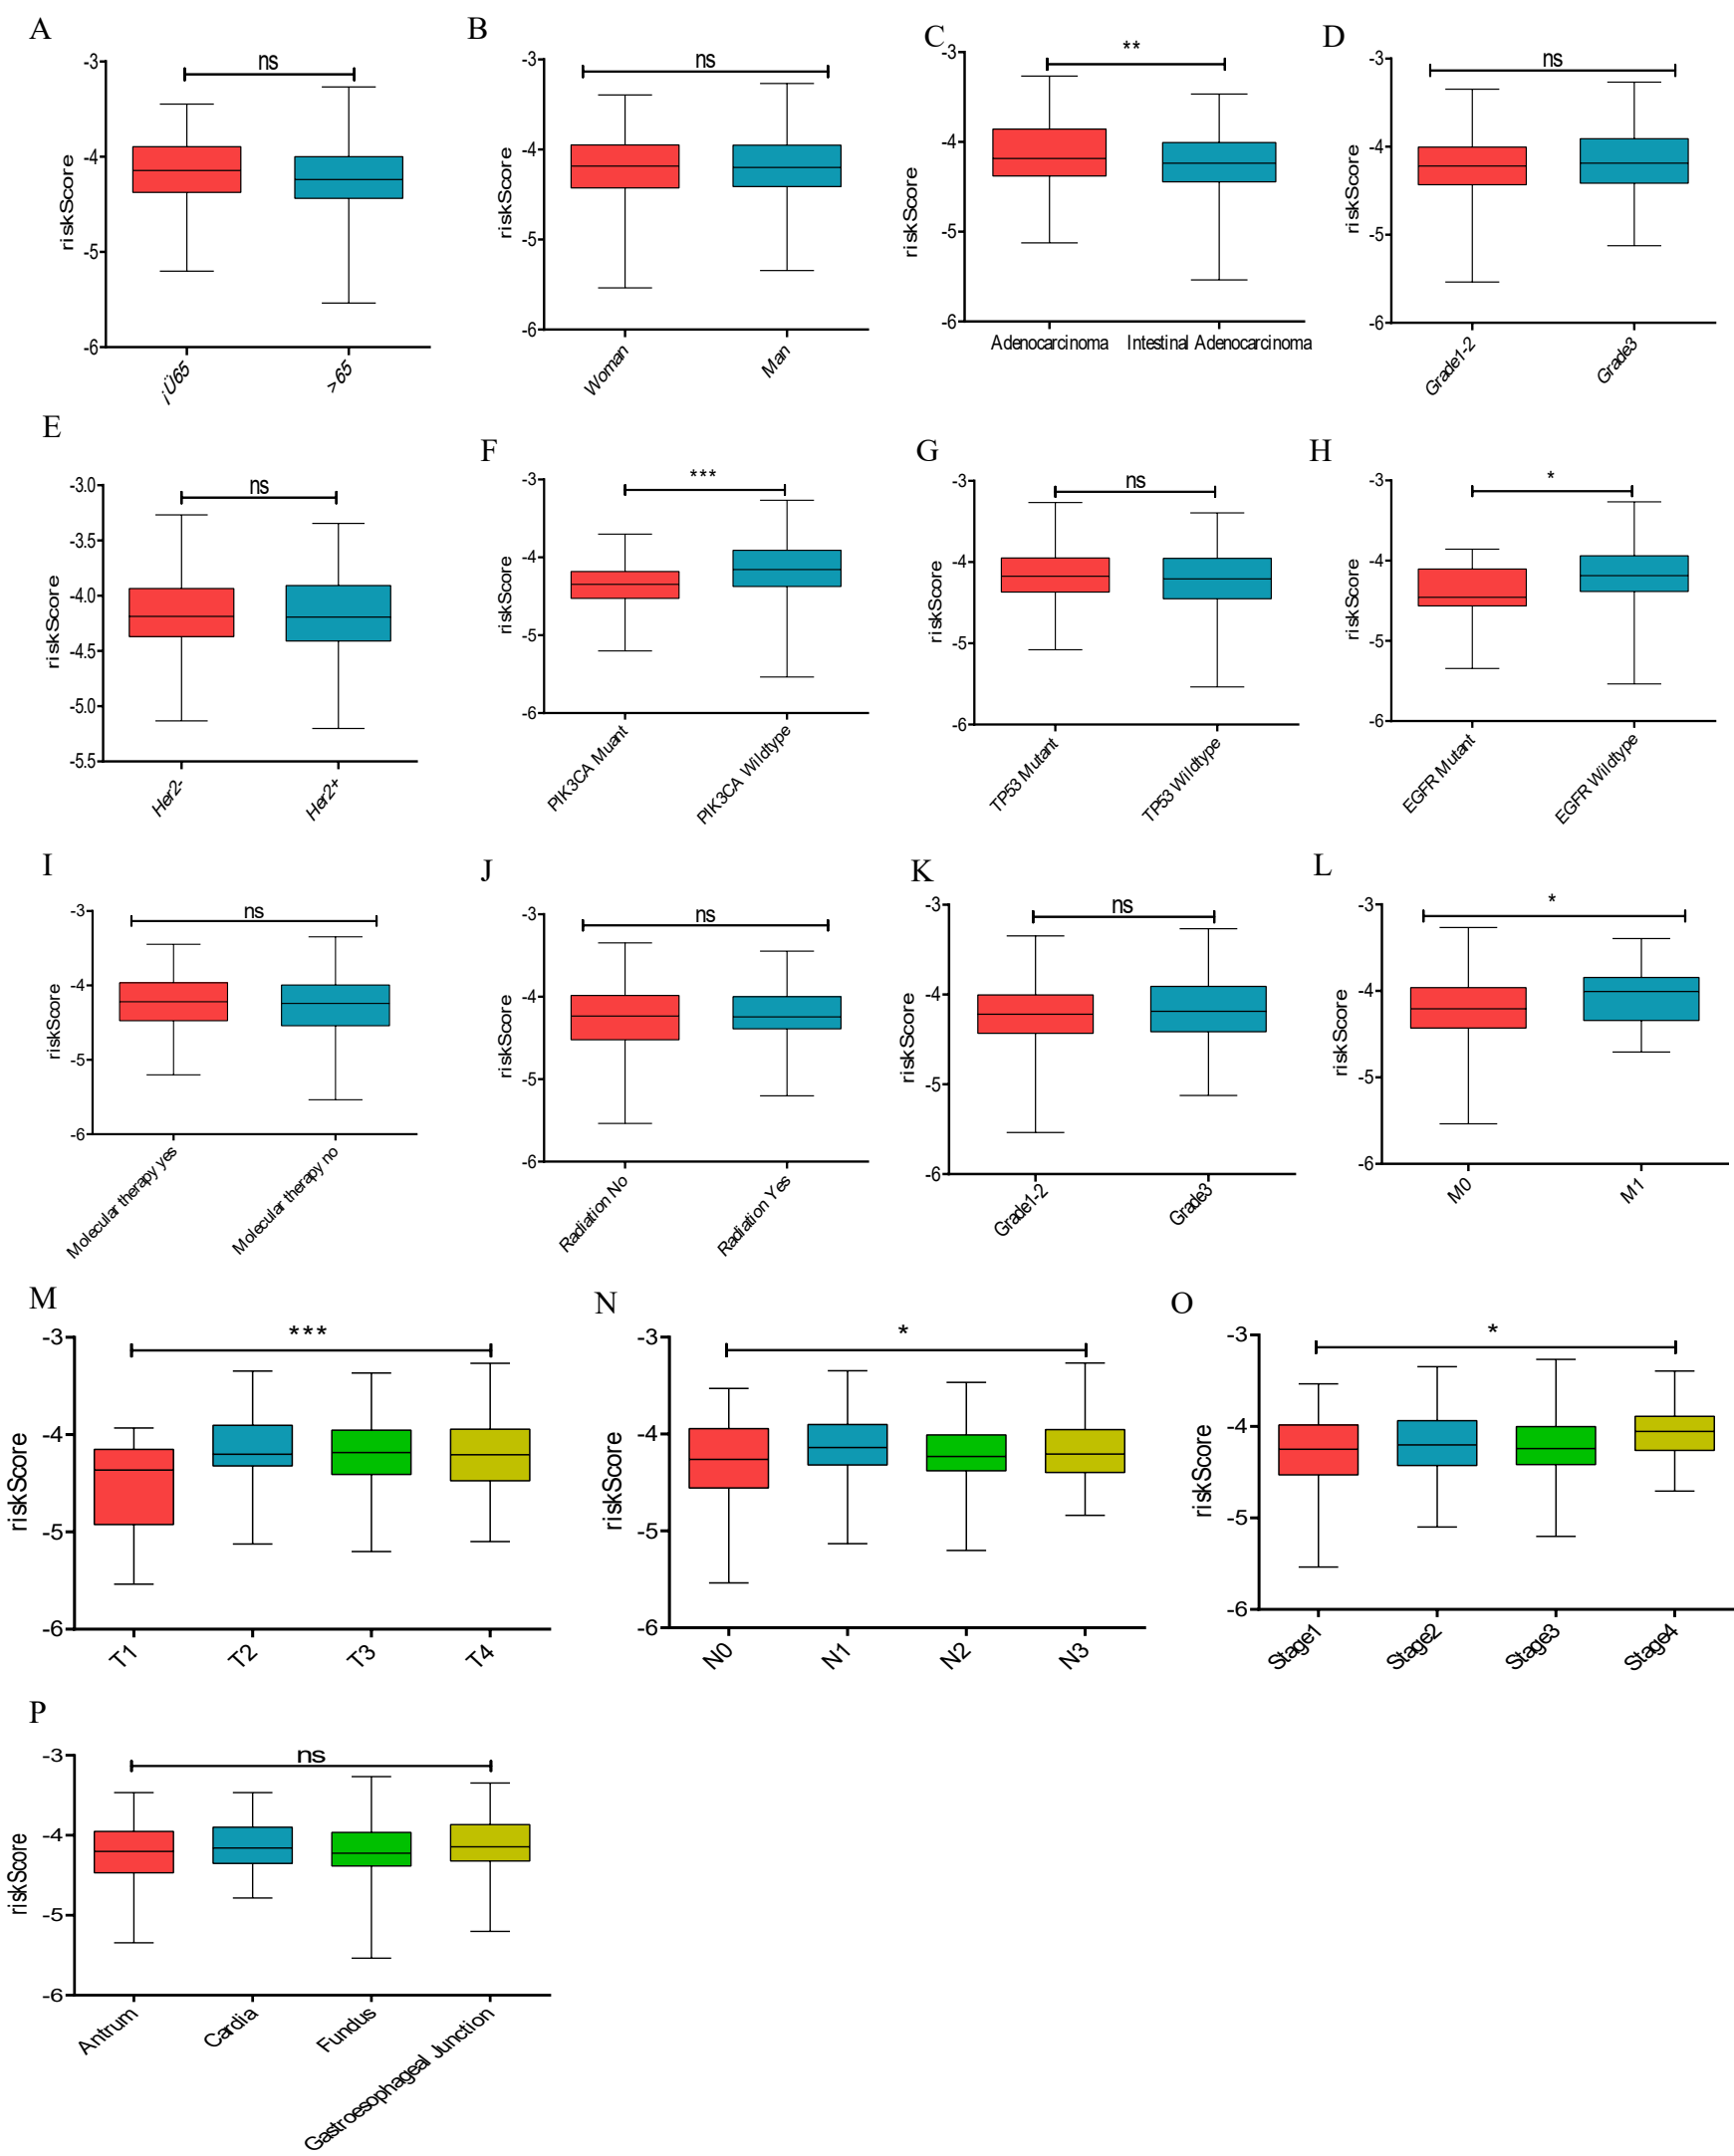

Supplement: MOESM6 [file 27008238]
