# Supplementary material for: Integrated multi-omics analysis and machine learning developed a prognostic model based on mitochondrial function in a large multicenter cohort for Gastric Cancer
Source: Springer Nature journal article supplement (doi:10.1186/s12967-024-05109-7), 2024-04-23
Supplement: MOESM8 [file 27008238]

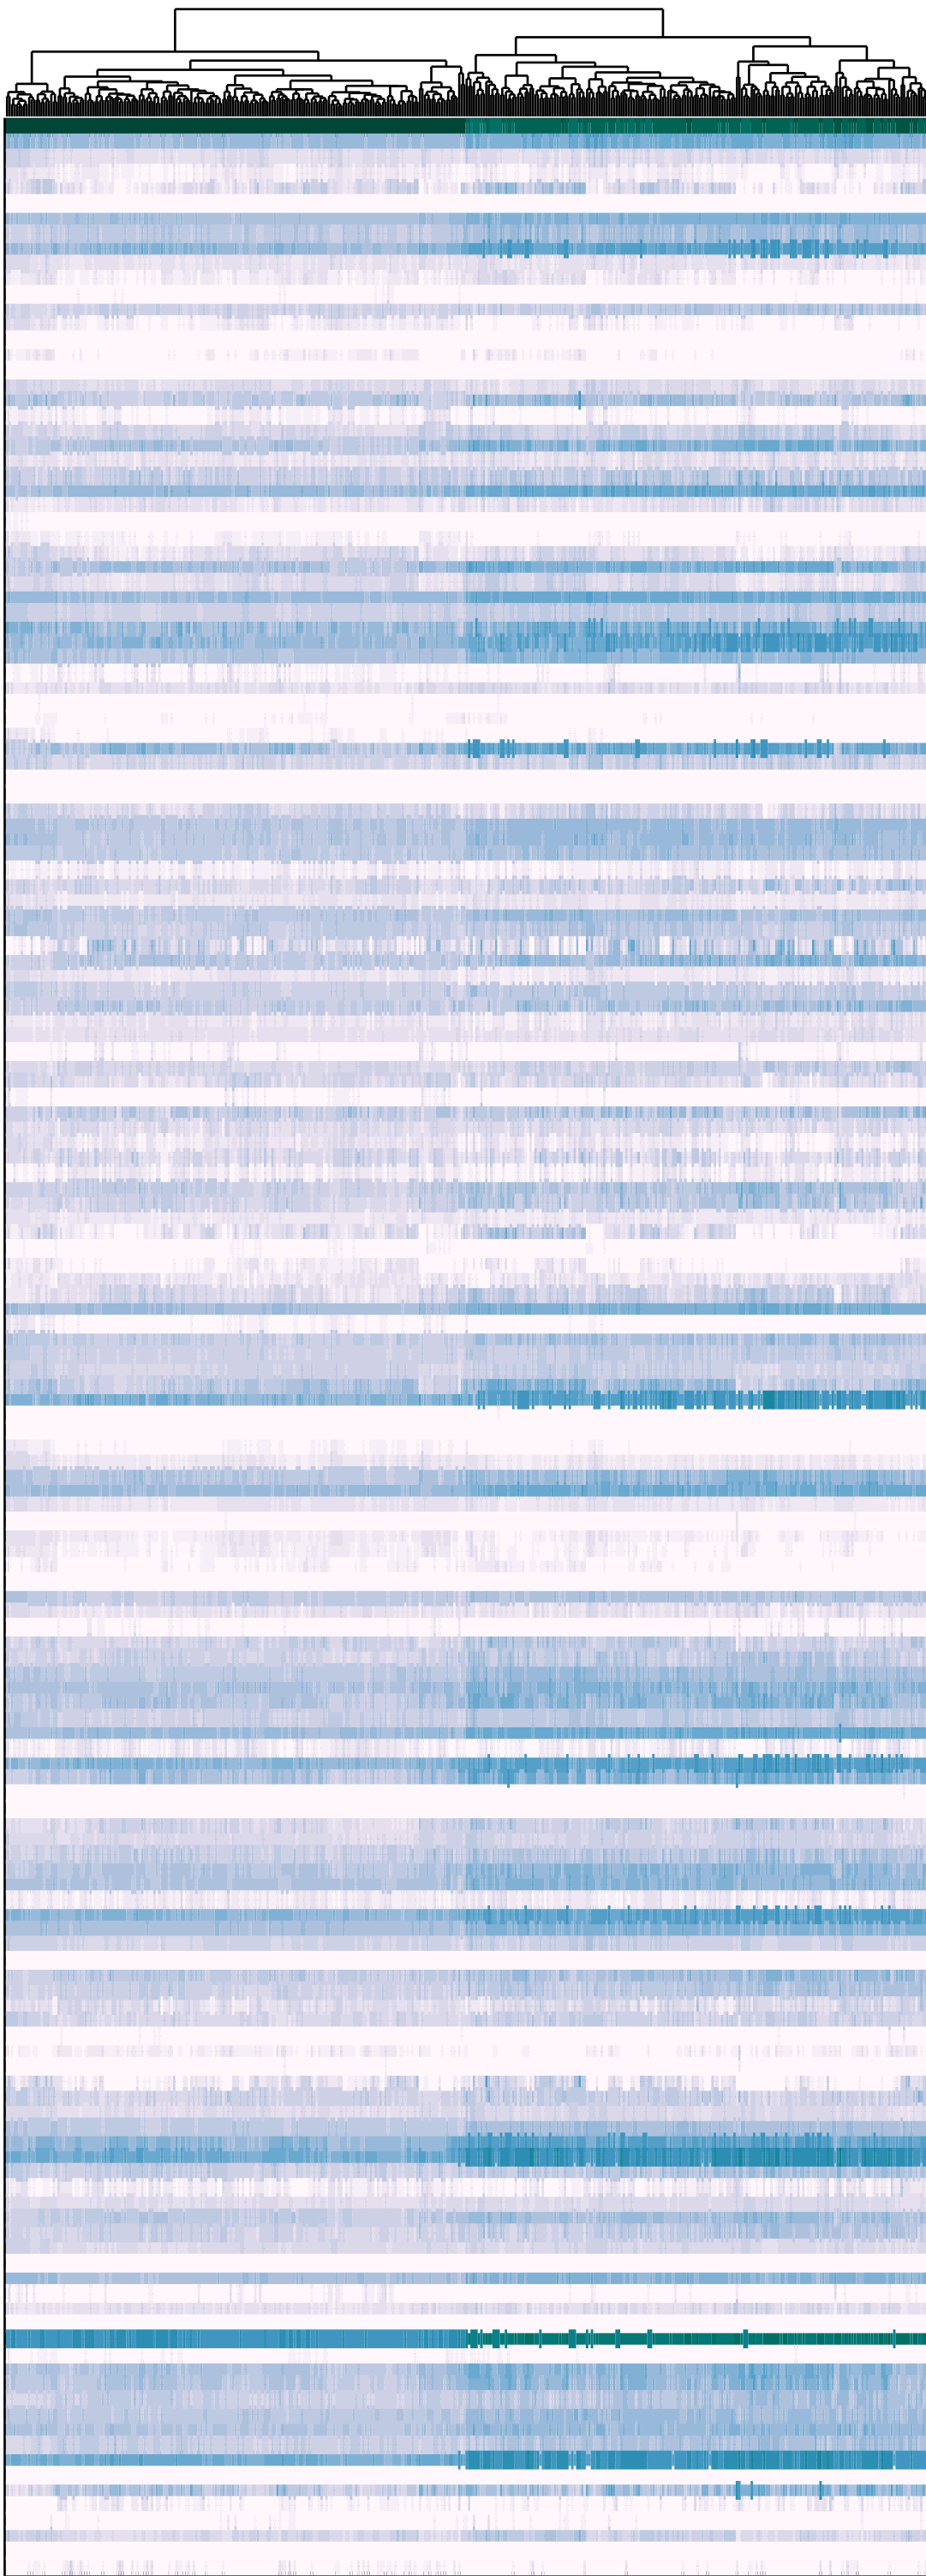

**Subgroup**

- ADHERENS JUNCTION
- ADIPOCYTOKINE SIGNALING PATHWAY
- ALDOSTERONE REGULATED SODIUM REABSORPTION
- ALLOGRAFT REJECTION
- ALPHA LINOLENIC ACID METABOLISM
- ALZHEIMERS DISEASE
- AMINO SUGAR AND NUCLEOTIDE SUGAR METABOLISM
- AMINOACYL TRNA BIOSYNTHESIS
- AMYOTROPHIC LATERAL SCLEROSIS ALS
- ANTIGEN PROCESSING AND PRESENTATION
- ARACHIDONIC ACID METABOLISM
- ARGININE AND PROLINE METABOLISM
- ARRHYTHMOGENIC RIGHT VENTRICULAR CARDIOMYOPATHY\_ARVC
- ASCORBATE\_AND\_ALDARATE\_METABOLISM
- ASTHMA
- AUTOIMMUNE THYROID\_DISEASE
- AXON GUIDANCE
- B CELL RECEPTOR SIGNALING\_PATHWAY
- BASAL CELL CARCINOMA
- BASAL\_TRANSCRIPTION\_FACTORS
- BASE EXCISION REPAIR
- BETA-ALANINE METABOLISM
- BIOSYNTHESIS OF UNSATURATED\_FATTY\_ACIDS
- BLADDER CANCER
- BUTANOATE METABOLISM
- CALCIUM SIGNALING PATHWAY
- CARDIAC MUSCLE CONTRACTION
- CELL ADHESION MOLECULES CAMS
- CELL CYCLE
- CHEMOKINE SIGNALING PATHWAY
- CHRONIC MYELOID LEUKEMIA
- ERBB SIGNALING PATHWAY
- CIRCADIAN RHYTHM MAMMAL
- CITRATE CYCLE TCA-CYCLE
- COLORECTAL CANCER
- COMPLEMENT AND COAGULATION CASCADES
- CYSTEINE AND METHIONINE METABOLISM
- CYTOKINE-CYTOKINE RECEPTOR INTERACTION
- CYTOSOLIC DNA SENSING PATHWAY
- DILATED CARDIOMYOPATHY
- DNA REPLICATION
- DORSO VENTRAL AXIS FORMATION
- DRUG METABOLISM CYTOCHROME P450
- DRUG METABOLISM OTHER ENZYMES
- ECM RECEPTOR INTERACTION
- ENDOCYTOSIS
- ENDOMETRIAL CANCER
- EPITHELIAL CELL SIGNALING IN HELICOBACTER PYLORI INFECTION
- ETHER LIPID METABOLISM
- FATTY ACID METABOLISM
- FC EPSILON R1 SIGNALING PATHWAY
- FC GAMMA R MEDIATED PHAGOCYTOSIS
- FOCAL ADHESION
- FOLATE BIOSYNTHESIS
- FRUCTOSE AND MANNOSE METABOLISM
- GAP JUNCTION
- GLIOMA
- GLUTATHIONE METABOLISM
- GLYCEROLIPID METABOLISM
- GLYCEROPHOSPHOLIPID METABOLISM
- GLYCINE SERINE AND THREONINE METABOLISM
- GLYCOLYSIS GLUCONEOGENESIS
- GLYCOSAMINOGLYCAN BIOSYNTHESIS CHONDROITIN SULFATE
- GLYCOSAMINOGLYCAN BIOSYNTHESIS HEPARAN SULFATE
- GLYCOSAMINOGLYCAN BIOSYNTHESIS KERATAN SULFATE
- GLYCOSAMINOGLYCAN DEGRADATION
- GLYCOSPHINGOLIPID BIOSYNTHESIS GANGLIO SERIES
- GLYCOSPHINGOLIPID BIOSYNTHESIS GLOBO SERIES
- GLYCOSPHINGOLIPID BIOSYNTHESIS LACTO AND NEOLACTO SERIES
- GLYCOSYLPHOSPHATIDYLINOSITOL GPI ANCHOR BIOSYNTHESIS
- GLYOXYLATE AND DICARBOXYLATE METABOLISM
- GNRH SIGNALING PATHWAY
- GRAFT VERSUS HOST DISEASE
- HEDGEHOG SIGNALING PATHWAY
- HEMATOPOIETIC CELL LINEAGE
- HISTIDINE METABOLISM
- HOMOLOGOUS RECOMBINATION
- HUNTINGTONS DISEASE
- HYPERTROPHIC CARDIOMYOPATHY HCM
- INOSITOL PHOSPHATE METABOLISM
- INSULIN SIGNALING PATHWAY
- LEUKOCYTE TRANSENDOTHELIAL MIGRATION
- LEISHMANIA INFECTION
- LIMONENE AND PINENE DEGRADATION
- JAK STAT SIGNALING PATHWAY
- LINOLEIC ACID METABOLISM
- LONG TERM DEPRESSION
- LONG TERM POTENTIATION
- LYSINE DEGRADATION
- LYSOSOME
- MAPK SIGNALING PATHWAY
- MATURITY ONSET DIABETES OF THE YOUNG
- MELANOGENESIS
- MELANOMA
- NATURAL KILLER CELL MEDIATED CYTOTOXICITY
- NEUROACTIVE LIGAND RECEPTOR INTERACTION
- NEUROTROPHIN SIGNALING PATHWAY
- NICOTINATE AND NICOTINAMIDE METABOLISM
- NITROGEN METABOLISM
- NOD LIKE RECEPTOR SIGNALING PATHWAY
- NON-HOMOLOGOUS END JOINING
- NON-SMALL CELL LUNG CANCER
- NOTCH SIGNALING PATHWAY
- NUCLEOTIDE EXCISION REPAIR
- MTOR SIGNALING PATHWAY
- N GLYCAN BIOSYNTHESIS
- O GLYCAN BIOSYNTHESIS
- OXIDATIVE PHOSPHORYLATION
- MISMATCH REPAIR
- METABOLISM OF XENOBIOTICS BY CYTOCHROME P450
- OLEFACTORY TRANSDUCTION
- ONE CARBON POOL BY FOLATE
- OOCYTE MEIOSIS
- OTHER GLYCAN DEGRADATION
- P53 SIGNALING PATHWAY
- PANCREATIC CANCER
- PANTOTHENATE AND COA BIOSYNTHESIS
- PARKINSONS DISEASE
- PATHOGENIC ESCHERICHIA COLI INFECTION
- PATHWAYS IN CANCER
- PENTOSE AND GLUCURONATE INTERCONVERSIONS
- PENTOSE PHOSPHATE PATHWAY
- PEROXISOME
- PHENYLALANINE METABOLISM
- PHOSPHATIDYLINOSITOL SIGNALING SYSTEM
- PORPHYRIN AND CHLOROPHYLL METABOLISM
- PPAR SIGNALING PATHWAY
- PRIMARY BILE ACID BIOSYNTHESIS
- PRIMARY IMMUNODEFICIENCY
- PRION DISEASES
- PROGESTERONE MEDIATED OOCYTE MATURATION
- PROSTATE CANCER
- PROTEASOME
- PROTEIN EXPORT
- PROPANOATE METABOLISM
- PROXIMAL TUBULE BICARBONATE RECLAMATION
- PURINE METABOLISM
- PYRIMIDINE METABOLISM
- PYRUVATE METABOLISM
- REGULATION OF ACTIN CYTOSKELETON
- REGULATION OF AUTOPHAGY
- RENAL CELL CARCINOMA
- RENIN ANGIOTENSIN SYSTEM
- RIBOFLAVIN METABOLISM
- RETINOL METABOLISM
- RIBOSOME
- RIG I LIKE RECEPTOR SIGNALING PATHWAY
- RNA DEGRADATION
- RNA POLYMERASE
- SELENOAMINO ACID METABOLISM
- SMALL CELL LUNG CANCER
- SNARE INTERACTIONS IN VESICULAR TRANSPORT
- SPHINGOLIPID METABOLISM
- SPLICEOSOME
- STARCH AND SUCROSE METABOLISM
- STEROID BIOSYNTHESIS
- SULFUR METABOLISM
- SYSTEMIC LUPUS ERYTHEMATOSUS
- T CELL RECEPTOR SIGNALING PATHWAY
- TASTE TRANSDUCTION
- TAURINE AND HYPOTAURINE METABOLISM
