# Supplementary material for: Integrated multi-omics analysis and machine learning developed a prognostic model based on mitochondrial function in a large multicenter cohort for Gastric Cancer
Source: Springer Nature journal article supplement (doi:10.1186/s12967-024-05109-7), 2024-04-23
Supplement: MOESM9 [file 27008238]

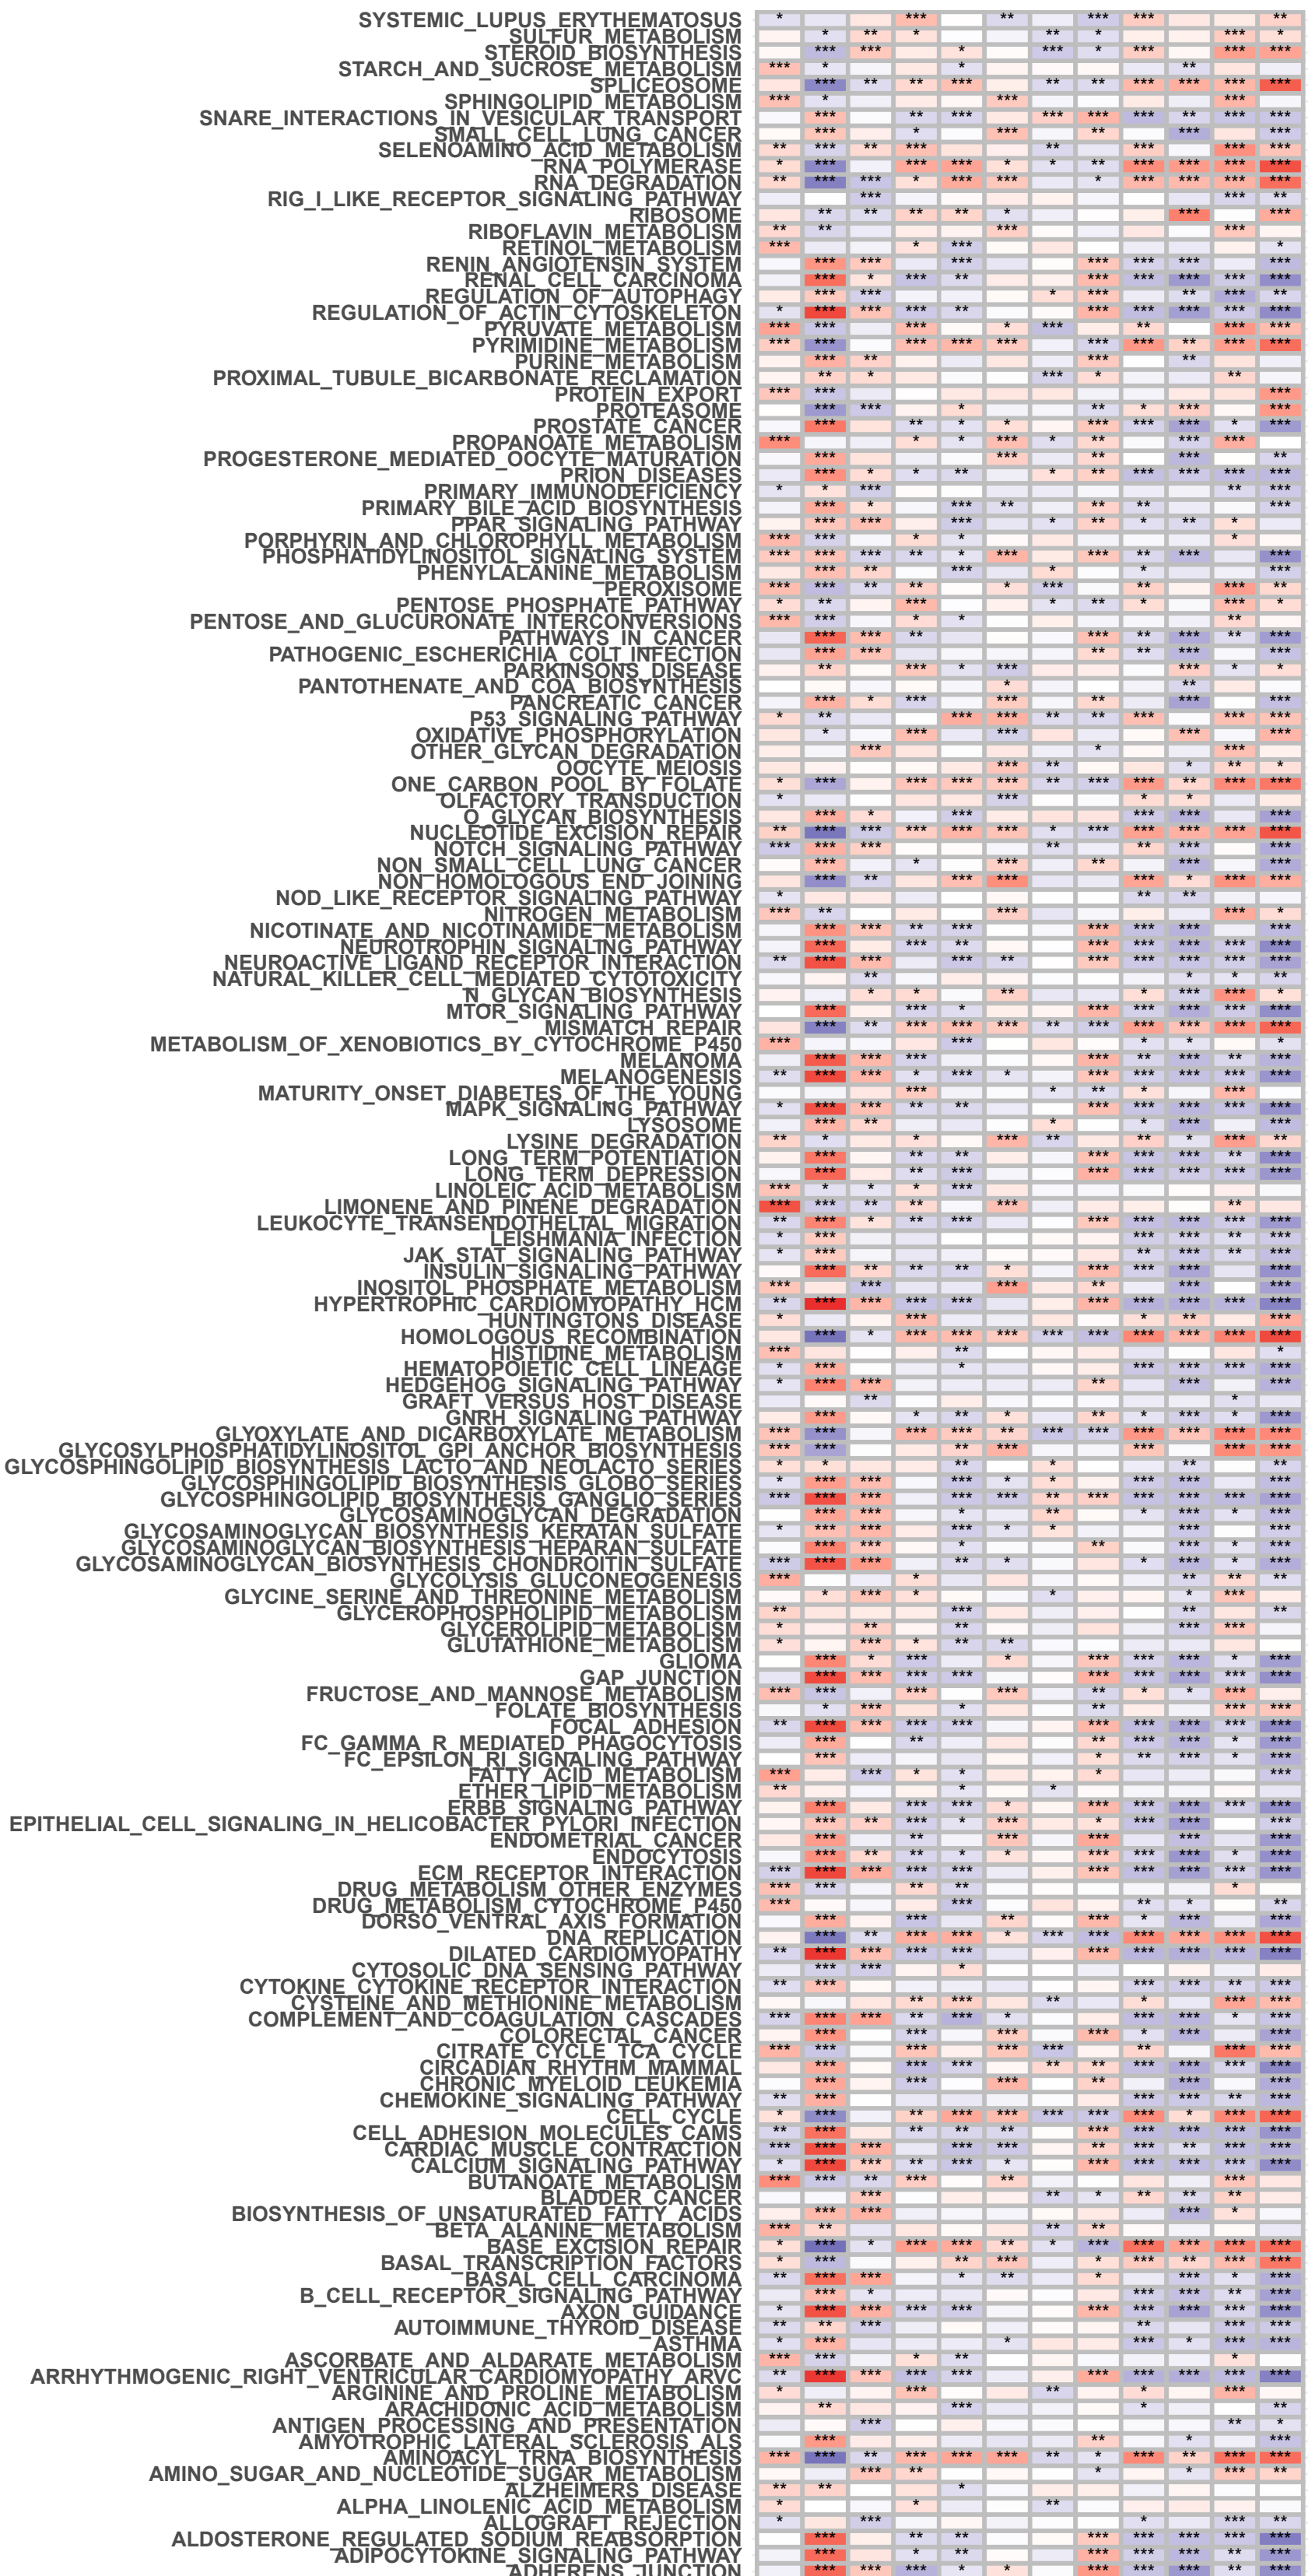

\*\*\* p<0.001  
 \*\* p<0.01  
 \* p<0.05

Correlation

0.6  
 0.3  
 0.0  
 -0.3  
 -0.6

ALDH3A2  
 ARMCX2  
 FKBP10  
 GCDH  
 GLS2  
 IDE  
 LETM2  
 OSBPL1A  
 POLRMT  
 QTRT1  
 SLC25A15  
 TIMM8A
